# Supplementary material for: Hydrophobic polymerized ionic liquids for trace metal solid phase extraction: thallium transfer from hydrochloric acid media
Source: Royal Society of Chemistry journal article supplement (doi:10.1039/c9nj00689c), 2019-01-01
Supplement: c9nj00689c1.pdf [file c9nj00689c1.pdf]

## New Journal of Chemistry

### Hydrophobic Polymerized Ionic Liquid for Trace Metal Solid Phase Extraction: Thallium Transfer from Hydrochloric Acid Media

Evgeny E. Tereshatov,<sup>a,\*</sup> Maria Boltoeva,<sup>b</sup> Valérie Mazan,<sup>b,1</sup> Colton Baley,<sup>a,c,2</sup> Charles M. Folden III<sup>a,d</sup>

<sup>a</sup>Cyclotron Institute, Texas A&M University, College Station, TX 77843 USA

<sup>b</sup>Université de Strasbourg, CNRS, IPHC, UMR 7178, F-67000 Strasbourg, France

<sup>c</sup>Department of Nuclear Engineering, Texas A&M University, College Station, TX 77843 USA

<sup>d</sup>Department of Chemistry, Texas A&M University, College Station, TX 77843 USA

\*E-mail address of the corresponding author: [etereshatov@tamu.edu](mailto:etereshatov@tamu.edu)

<sup>1</sup>Present address: Université de Strasbourg, CNRS, LIMA, UMR 7042, F-67087 Strasbourg, France

<sup>2</sup>Present address: University of Texas Health Science Center at San Antonio, San Antonio, TX 78229 USA

### Supplementary Information

Figure S1 shows the adsorption isotherm for trivalent thallium extracted by the polymerized ionic liquid.

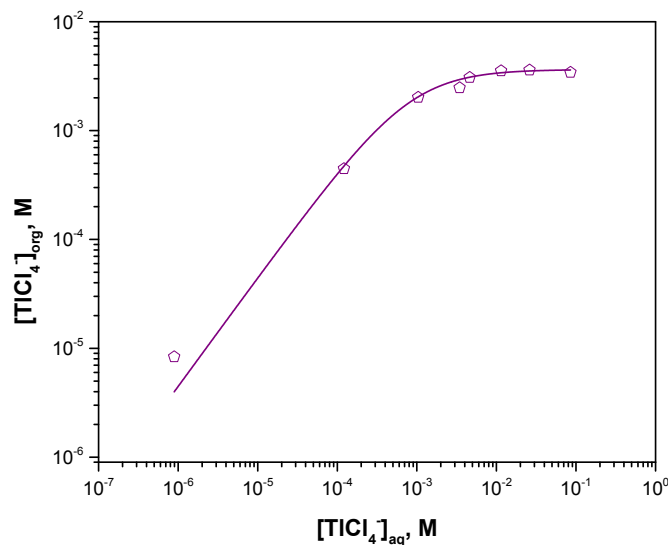

**Fig. S1** Langmuir equation (adsorption isotherm) applied to experimental data of thallium species distributed between a 0.5 M HCl aqueous solution and the [PDDA][Tf<sub>2</sub>N]<sub>n</sub> ionic liquid. The solid line is drawn according to Eq. 23.

Figure S2 shows the experimental data used to determine a corresponding reaction order.

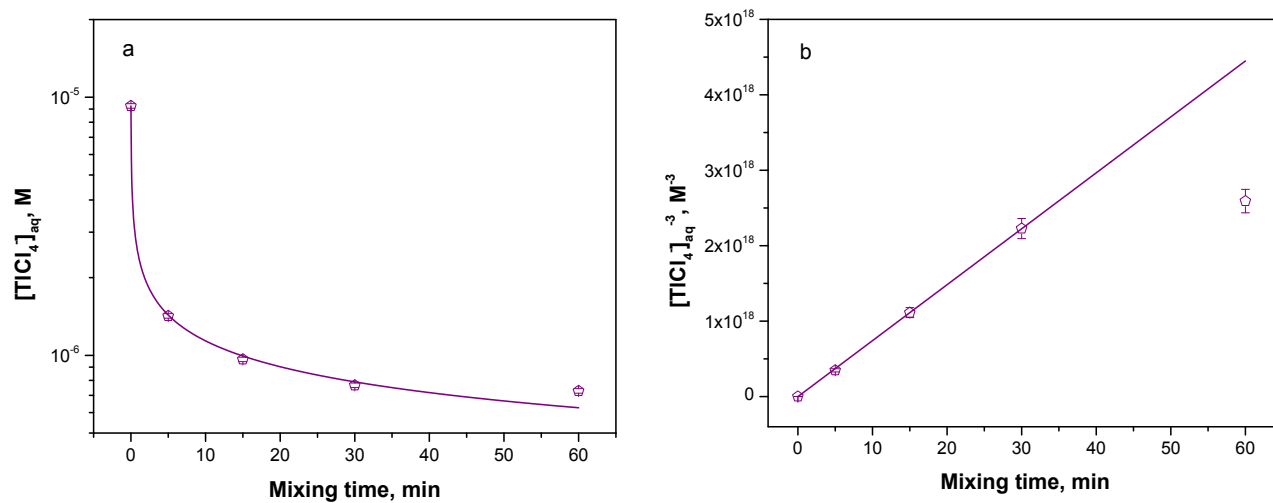

**Fig. S2** Effect of mixing time on the concentration of Tl(III) remaining in the aqueous phase after extraction from 0.5 M HCl feed solution with the poly(ionic liquid) [PDDA][Tf<sub>2</sub>N]<sub>n</sub>: a)  $C = f(t)$ , b)  $C^{-3} = f(t)$ . The solid-to-liquid phase ratio is 0.05 g/mL. The initial concentration of Tl(III) in the aqueous phase is  $9.3 \cdot 10^{-6}$  M. The solid lines are drawn according to Eq. 28 ( $n = 4$ ).
